# Supplementary material for: One-step synthesis of amikacin modified fluorescent carbon dots for the detection of Gram-negative bacteria like Escherichia coli
Source: Royal Society of Chemistry journal article supplement (doi:10.1039/c6ra15778e), 2016-01-01
Supplement: c6ra15778e1.pdf [file c6ra15778e1.pdf]

# Supporting information

One-step synthesis of amikacin modified fluorescent carbon dots for the detection of Gram-negative bacteria like *Escherichia coli*.

Soumen Chandra, Angshuman Ray Chowdhuri, Triveni Kumar Mahto, Arpita Samui,  
Sumanta kumar Sahu\*

*Department of Applied Chemistry, Indian School of Mines, Dhanbad 826004, Jharkhand,  
India*

\* Corresponding author. E-mail: sahu.s.ac@ismdhanbad.ac.in, sumantchem@gmail.com;  
Fax: +91 326-2307772; Tel: +91 3262235936

**Note added after first publication:** This Supplementary Information file was updated on 13 February 2018, replacing that originally published on 25 July 2016, in which an incorrect image was included in Fig. S7 (b).

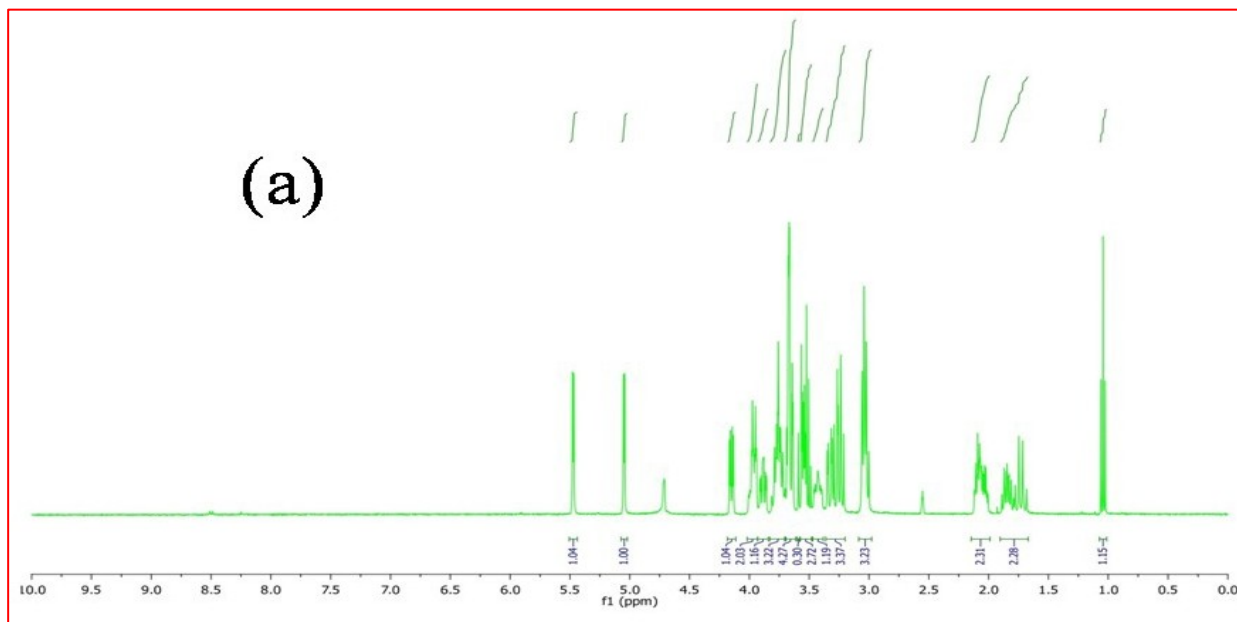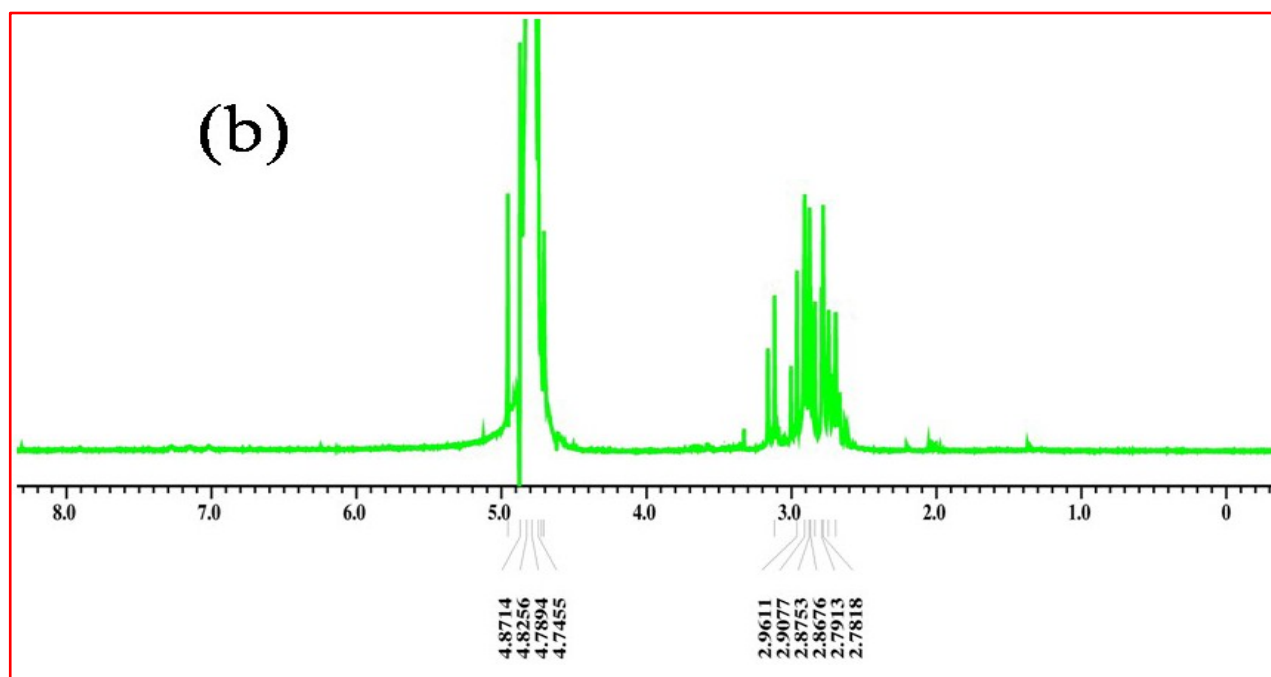

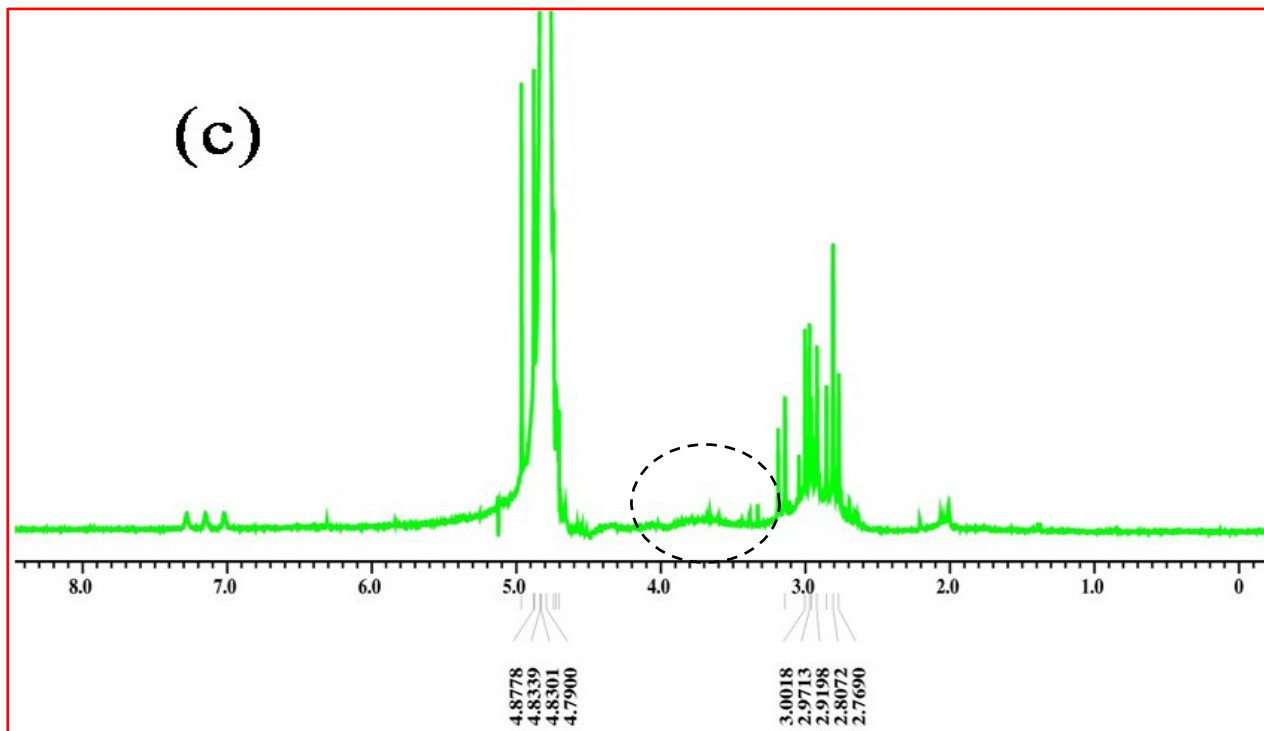

**Fig.S1:**  $^1\text{H}$ NMR of amikacin (a); CDs (b) and CDs@amikacin-1(c).

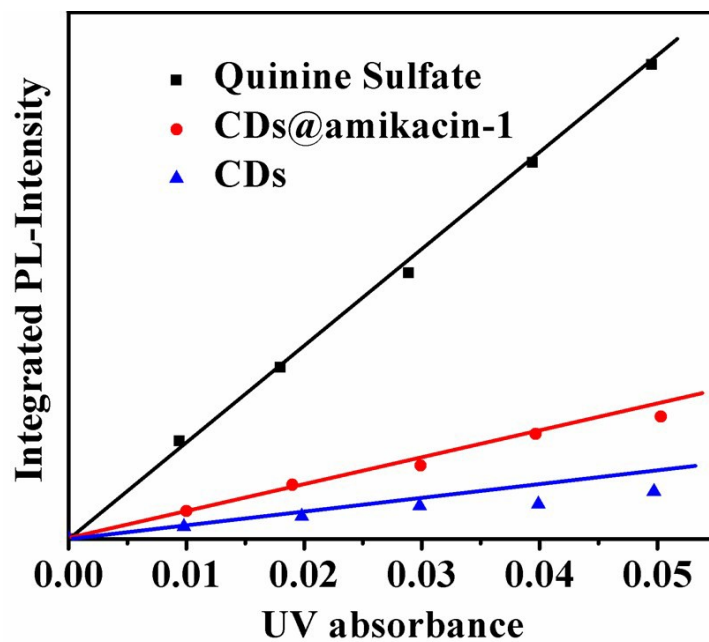

**Fig.S2:** Integrated fluorescence intensity versus UV-absorbance plot of the CDs@amikacin-1, CDs and Quinine Sulfate.

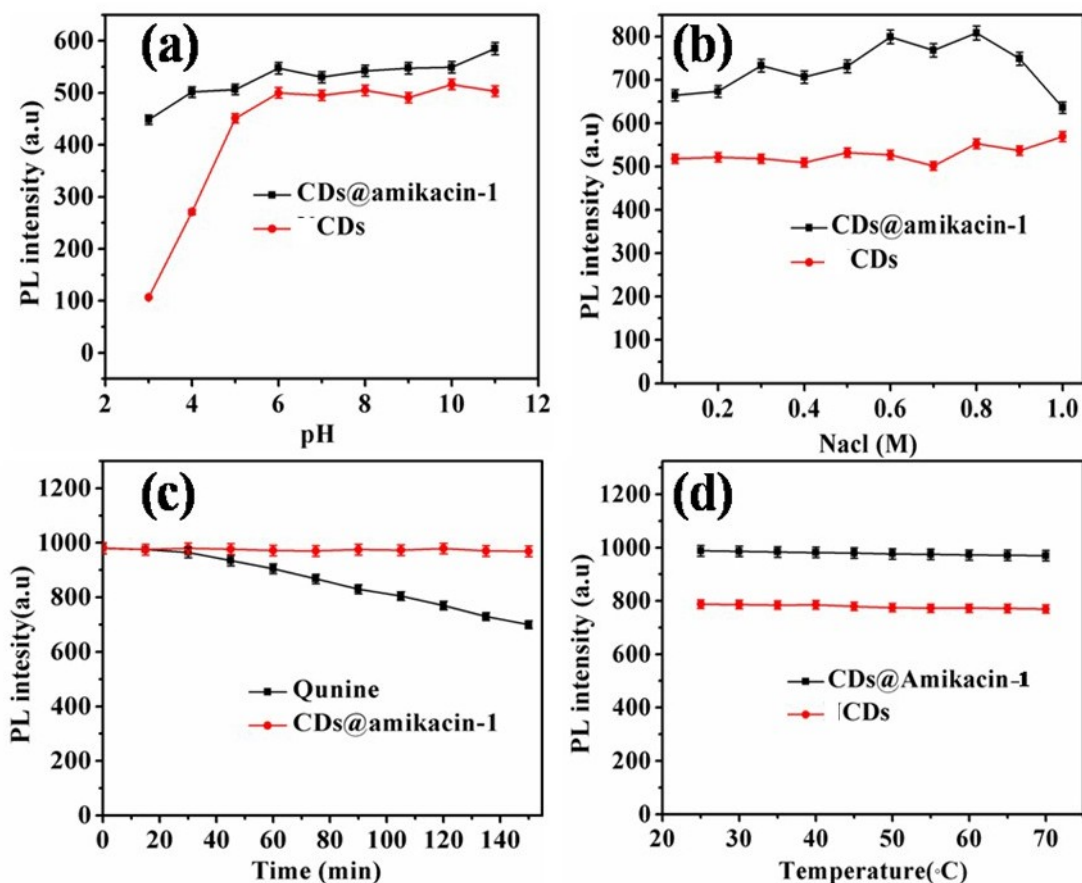

**Fig.S3:**(a) Effect of pH on the fluorescence intensity of CDs@amikacin-1 and CDs;(b) Effect of ionic strengths on the fluorescence intensity of CDs@amikacin-1 and CDs (ionic strengths were controlled by various concentrations of NaCl); (c) Change in fluorescence intensity of the CDs@amikacin-1 and commercial dye quinine with respect to time of irradiation of UV light radiation; (d) Change in fluorescence intensity of the CDs@amikacin-1 and CDs with increasing temperature.

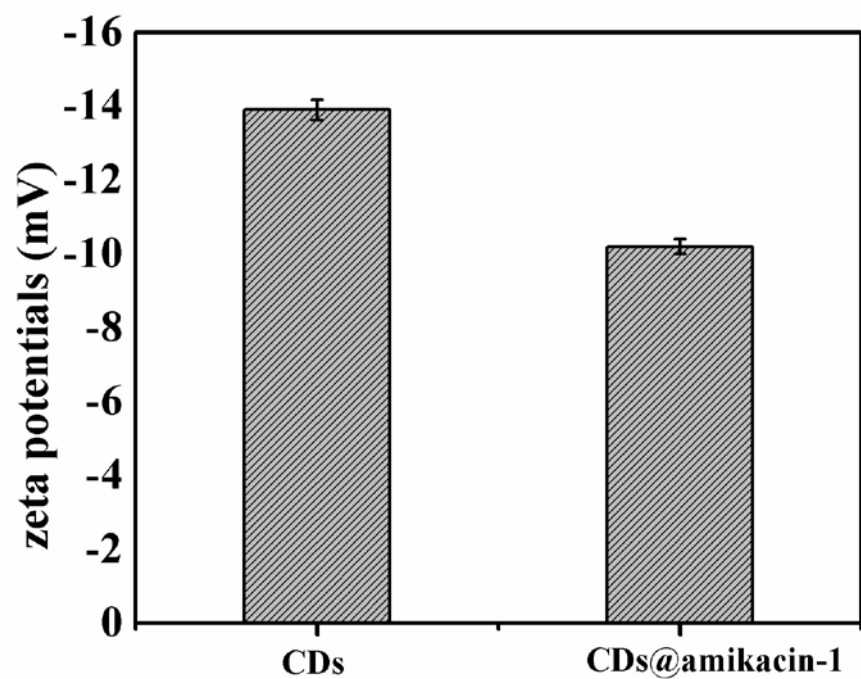

Fig. S4: Zeta potential of CDs@amikacin-1 and CDs at pH7.

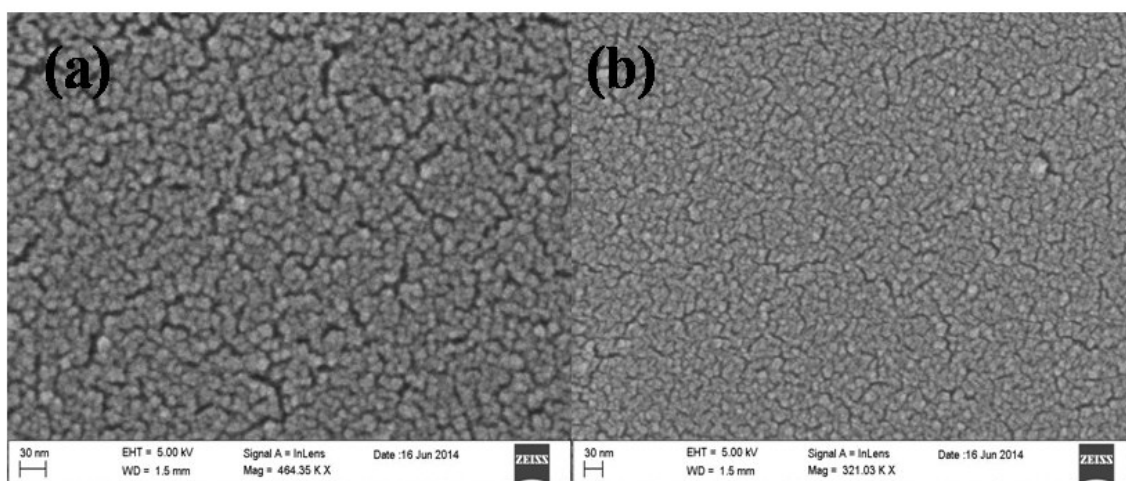

Fig.S5: FESEM image of the CDs@amikacin-1 (a) and CDs (b).

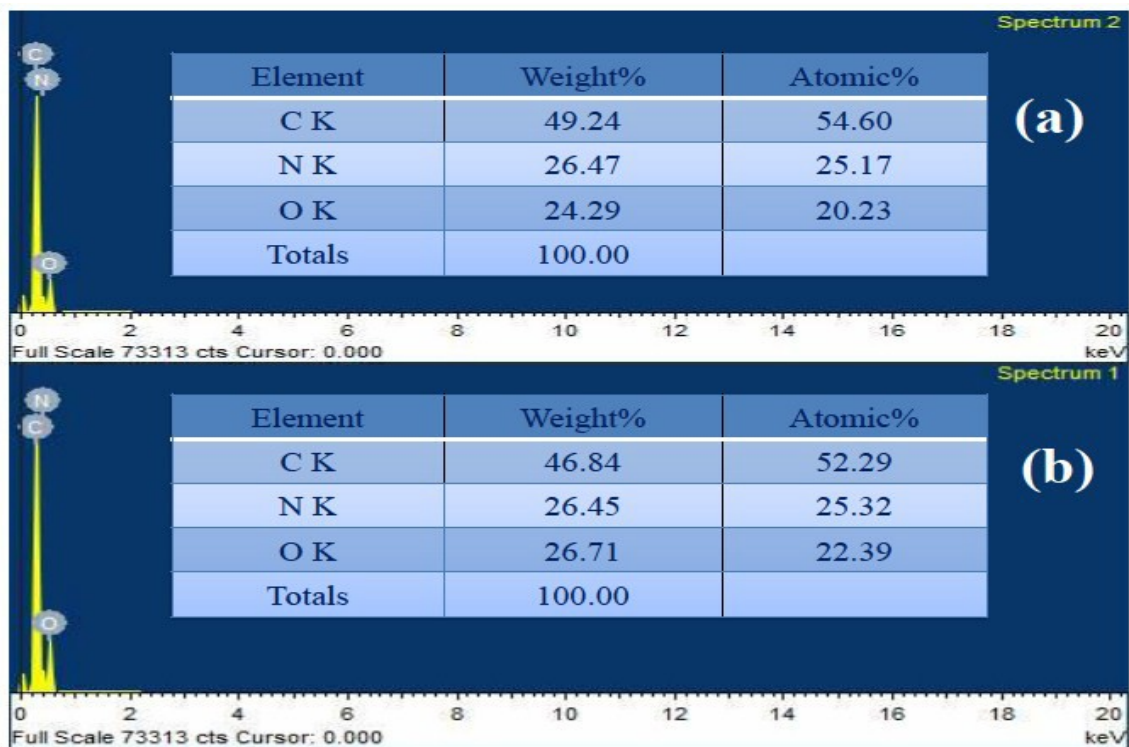

**Fig. S6:** EDX spectra and elemental composition of the as synthesised (a) CDs and (b) CDs@amikacin-1.

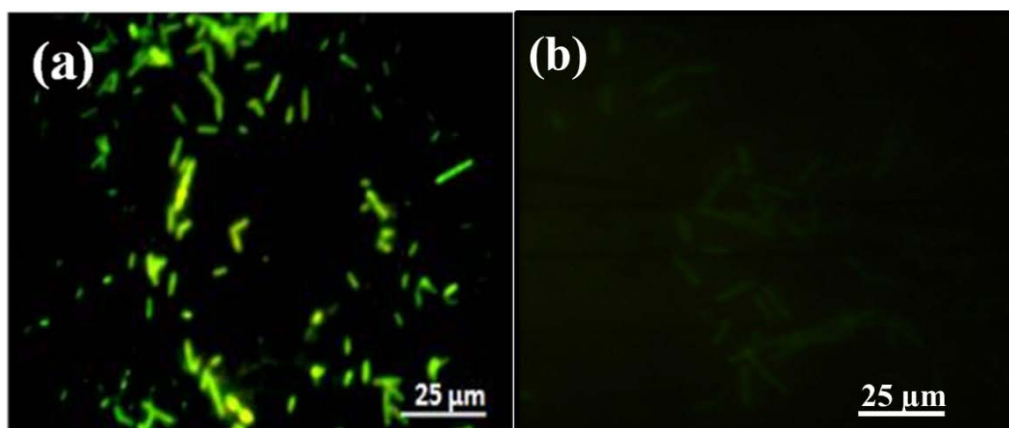

Fig.S7: Fluorescent image of *E. coli*. labeled with (a) CDs@amikacin-1 and (b) CDs@amikacin-2.

To examine the CDs attachment on the bacterial cells, CDs@amikacin-1 and CDs@amikacin-2 was incubated with *E. coli*. The *E. coli* concentration was adjusted to  $10^6$  cfu/mL. Each culture was incubated in a shaking incubator at 37 °C for overnight. The *E. coli* were washed twice with phosphate buffered saline to remove any unutilized CDs. The fluorescence intensity of CDs@amikacin-1 and CDs@amikacin-2 was analyzed under fluorescent microscope for detection of fluorescence intensity in bacterial cells. The fluorescent images reveals that *E. coli*. labeled with, CDs@amikacin-1 has higher fluorescence intensity in compared to *E. coli*. labeled with, CDs@amikacin-2, as shown in the Fig.S7.

**Table 1:** Comparative study for LOD values and linear ranges with our work and other previously reported work for *E.Coli* detection.

| References | LOD(cfu/mL)        | Linear range(cfu/mL)                    |
|------------|--------------------|-----------------------------------------|
| [1]        | $3.5 \times 10^2$  | $3.5 \times 10^2 - 2.9 \times 10^3$     |
| [2]        | $9.5 \times 10^4$  | $10^5 - 10^8$                           |
| [3]        | $4.5 \times 10^2$  | $10^3 - 10^8$                           |
| Our work   | $5.52 \times 10^2$ | $7.625 \times 10^2 - 3.904 \times 10^5$ |



## References:

1. M. L. Bhaisare, G. Gedda, M. S. Khan and H-F. Wu, *Analytica Chimica Acta*, 2016, **920**, 63-71.
2. N. Wang, Y.Wang, T. Guo, T.Yang, M.Chen and J.Wang, *Biosensors and Bioelectronics*, 2016, **85**, 68–75.
3. C-I. Weng, H-T. Chang, C-H. Lin, Y-W. Shen, B. Unnikrishnan, Y-J. Li, C-C.Huang, *Biosensors and Bioelectronics*, 2015, **68**, 1–6.
